# Supplementary material for: The development and evaluation of a hydrological seasonal forecast system prototype for predicting spring flood volumes in Swedish rivers
Source: Copernicus journal article supplement (doi:10.5194/hess-2017-588), 2017-10-23
Supplement: Supplementary file [file hess-2017-588-AC3-supplement.pdf]

## Response to reviewer's comments in SC1

Reviewer's comments are in blue, our comments are in black.

### Summary of the manuscript

The manuscript shows, how a hydrological seasonal forecast system prototype is adjusted from the previous version and evaluated on its ability to predict spring flood volumes in Swedish rivers. The aim is to improve water resource management for hydropower decision makers. The study area consists of 84 subbasins in northern Sweden, which have a runoff regime that is strongly influenced by spring snow melt. The skill of the multi-model prototype is compared in cross-validated hindcasts to the historical ensemble streamflow prediction based on measurements between 1981 and 2015. This historical ensemble represents the setup currently used for hydropower reservoir management. The multi-model prototype represents combinations of the historical ensemble, an analogue ensemble (subset of the historical ensemble based on similarities in parameters of interannual climate variability), a dynamic modelling ensemble (bias-corrected seasonal forecast) and a statistical modelling ensemble (downscaled seasonal forecast). Several complementary, statistical measures were used for the evaluation of the new prototype. The prototypes, that combine 3 different ensembles show at best a significant improvement compared to the currently used historical ensemble and at worst a comparable skill.

### Main assessment

Based on our assessment, the reviewed manuscript reaches a substantial conclusion based on sufficient results which generally were outlined clearly and used valid assumptions. Overall, we like the clear structure of the paper and the scientific notation. In the abstract and the introduction, it is nicely explained why there is a public benefit behind this research.

When we first read the introduction, we had some problems to understand the differences between the two approaches (dynamical and statistical). When we came to the points where it is explained better it is not a problem anymore. Maybe a quick hint to the section 2.14 and 2.15 would help the readers - or provide some of the clarifications already in the introduction.

#### 1)

We have added a cross reference to page 2, line 11 and line 12. It now reads as follows:

“In practice, there are two predominant approaches to making hydrological forecasts at the seasonal scale; statistical approaches and dynamical approaches (see Sect. 2.1.4 and Sect. 2.1.5 for more regarding these approaches in the context of this work).”

It would have been useful to add the research questions to the introduction. The paper describes what has been done, how it was tested and how good the new prototype is for catchments in Sweden but not explicitly what science question or hypothesis is answered.

**2)**

This is a valid point. We have added a sentence after page 1, line 13 and line 14 to include what the overarching hypothesis of this work is. It reads:

“The hypothesis explored in this work is that a multi-model seasonal forecast system which incorporates different modelling approaches is generally more skilful at forecasting the SFV in snow dominated regions than a forecast system that utilises only one approach.”

This, together with the beginning of the paragraph, now gives the reader a brief description of the issue this work is intended to address and the hypothesis that is tested.

The paper also does not discuss how applicable this method/prototype is for other snow dominated areas.

**3)**

We have added a paragraph that discusses this to the results and discussion section. See our response (no.7) to your comments:

Thanks to the SMHI, the datasets are very good, but we don't understand why the subbasins with 61, 63, and 73 percent of missing data are also included in these 84 basins that are investigated. Has it at least been checked whether and how the results change when those three subbasins are excluded?

**4)**

These stations were included because they are part of the operational forecast and are therefore relevant to the prototype. This we mention on page 11, line 25 and line 26. We did check how their inclusion affected the results and found that there was a small improvement in the skill of the prototype. This we attribute to an adverse affect they have on the statistical branch which needs to be trained on these historical data. However, the drop in skill is not such that it detracts from the general results. So, due to their importance to the prototype and the relative low impact they have on the performance we chose to retain them in this work.

The evaluation part from this study is very elaborate and we like this. However, it could have been more clearly explained what a 6% improvement means, for example in volume of water or economic value for hydropower generation. Is this 6% really significant?

**5)**

Please see our response (4<sup>th</sup>) to reviewer 2. Yes it is significant to the power companies. It is difficult to put clear contextual examples of what this improvements means economically.

We have made changes to the first third of the conclusion section (see our response no. 41 to your comments). In this we have included a volumetric interpretation of what a 6% reduction in SFV entails. The bullet point reads:

“• The prototype is able to reduce the forecast error by 6% on average. This translates to an average volume of  $9.5 \times 10^6 \text{ m}^3$ .”

We would have appreciated it if the paper provided a little more information about the seasonal meteorological forecasts that are used. For example something about the uncertainty of these models or why the ECMWF IFS system is used (is there no other meteorological forecast system for six months or is it the best seasonal forecast system)?

**6)**

The choice to use the ECMWF as a provider of the seasonal forecasts to force the prototype is primarily based on operational considerations. SMHI has operational access to these products so no extra effort is needed to source and collect these data. It should be noted that there are other seasonal forecast data providers and we are looking to test them in the future, however that is not part of the scope of this work.

We have added two sentences after the line on page 11, line 20 briefly motivating our choice. They read:

“The choice to use ECMWF data is primarily a practical one. The ECMWF is an established and proven producer of medium range forecasts and SMHI already has operational access to their products.”

Finally, it would have been interesting if the differences for the different catchments would have been discussed. Were the improvements mainly seen for large/small catchments, for high elevation/flat catchments? Some maps would have been nice as well.

**7)**

We have added a section to the Results and discussion section which addresses this point. It reads:

“3.4 Spatial and temporal variations and transferability of the prototype

Both multi-model ensembles show skill at forecasting SFV with respect to forecast error, ability to reproduce the interannual variability in SFV, and the ability to discriminate between BN, NN, and AN events. The prototype, in particular, is at worst comparable to the

HE and at best clearly more skilful. This relative performance of the prototype varies both in space and time. Figure 7 shows maps of the median bootstrapped FY+ values. For hindcasts initialised in January the spatial pattern in the FY+ scores show that the prototype tends to outperform HE more in subbasins that have a higher latitude or elevation. However, as the initialisation date approaches the spring flood period this pattern becomes less and less coherent. This general pattern is also true for MAESS scores. This suggests that the change in the performances of the prototype and HE, as a function of initialisation date, are not always similar for subbasins that are near one another. Further work would be needed to find out what the underlying reason for this is.

Data availability is the biggest limiting factor to the transferability of this approach to other areas. The HE, AE, and SE approaches are all dependant on good quality observation time-series. Additionally, the skill all three of these approaches would be expected to be affected by length of these time-series. They length of the time-series should be long enough to be a good representative sample of the climatology otherwise the forecasts would be biased in favour of the climate represented in the data and not the true climatology.

The SE and AE approaches require an understanding of how the variability in the local hydrology is affected by large scale circulation phenomena such as teleconnection patterns to help select predictors and teleconnection indices for inputs to each approach respectively. The hydrological rainfall-runoff model used in the prototype should not pose a problem, although HBV has been successfully setup for snow dominated catchments outside of Sweden (e.g. Seibert et al., 2010; Okkonen and Kløve, 2011), any sufficiently well calibrated rainfall-runoff model would suffice.

We believe that, if the above requirements are met, a seasonal hydrological forecast system similar to the prototype can be setup in other snow dominated regions around the world.”

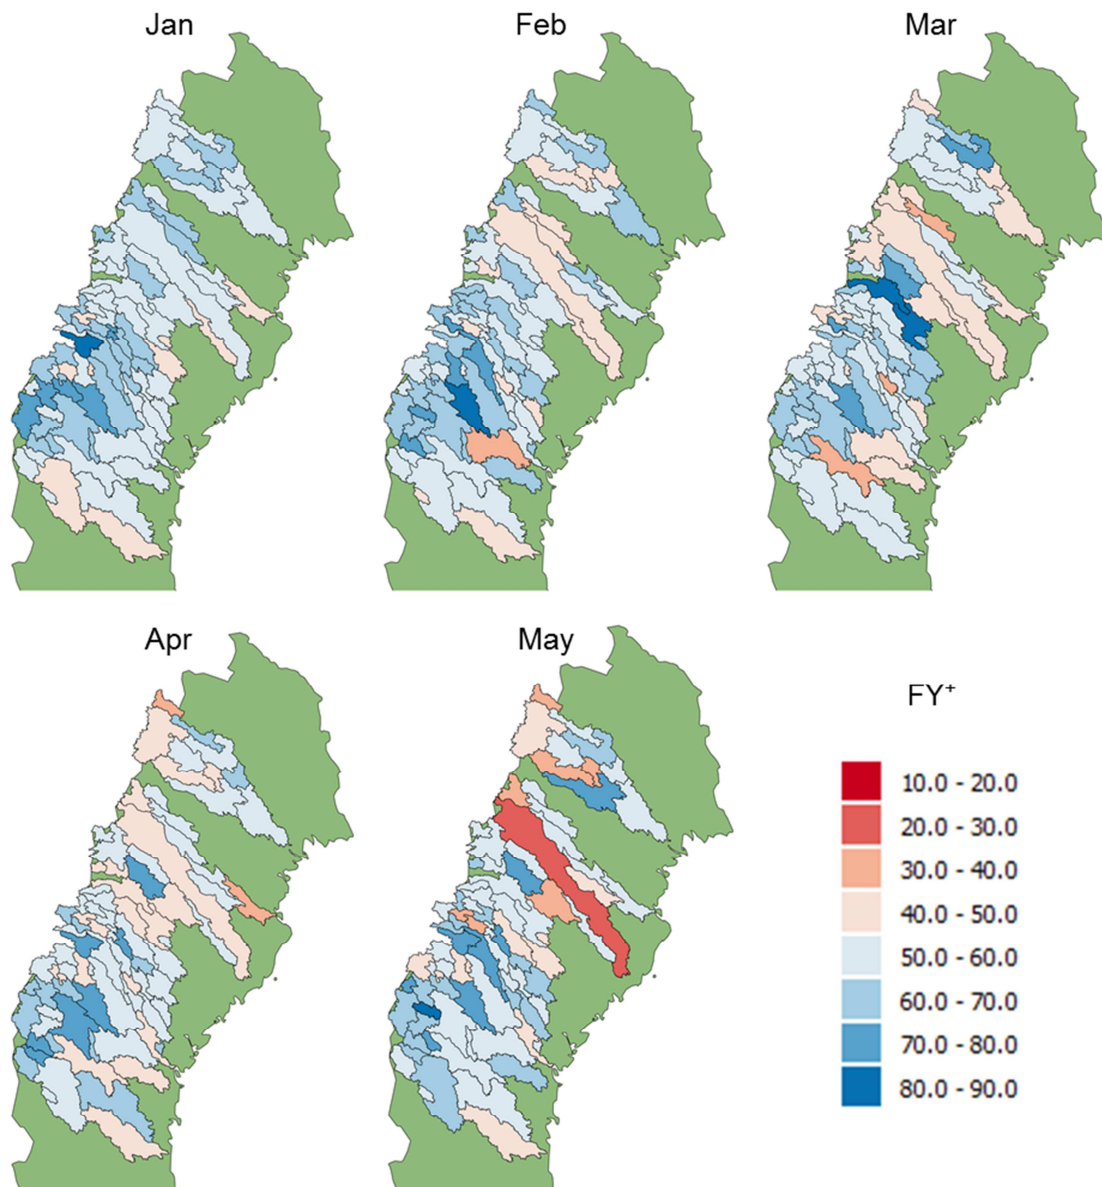

Figure 7. Maps of the median bootstrapped FY+ values for each of the initialisation dates.

### List of major and minor points

Page one:

Lines 8-10: In our opinion a very catchy and smart opening.

8)

Thank you.

Line 15 to 18: This sentence is maybe too long and little too complicated for the abstract. (Full stop before 'however?'). Twice 'considered'

**9)**

This sentence has been broken up and now reads:

“Both the multi-model methods considered showed skill over the reference forecasts. The version that combined the historical modelling chain, dynamical modelling chain, and statistical modelling chain performed better than the other and was chosen for the prototype.”

Line 23: Unclear reference, presumably ‘Statistiska centralbyrån’? For clarity, the abbreviation can be included in the reference (Statistiska centralbyrån (SCB): ...)

**10)**

The reference in page 1, line 23 has been changed from the abbreviation to the full reference.

Line 27 to 28: The idea or point behind the sentence comes across. But if you first read this sentence, it could be puzzling. We also think that with all these brackets the text looks not as nice as it could. Why not just add 'and vice versa' at the end of the sentence?

**11)**

Yes the use of vice versa does improve the readability of the sentence without detracting from the message. The sentence has been rewritten as suggested. It now reads:

“This reservoir management is important as the energy demand is out of phase with the natural availability of the water resources; typically demand is higher during the colder months when the inflows are lower and vice versa.”

Page two:

Line 3: Grammatical: The strategy is to have reservoirs which are then managed. Line 4: comma: To achieve this, operators ...

**12)**

Please see our response (4<sup>th</sup>) to reviewer 1.

Line 6: The meaning of the expression ‘sources of predictability’ is unclear to us in this situation. Can you explain briefly?

**13)**

The expression refers to where the signal that gives skill to the forecasts originates from. The SFV is a function of many hydrometeorological factors but some influence the variability of the SFV more than others. For example, in the context of this work, the snowpack is a major contributor to the SFV and therefore data related to the amount of water stored in the

snowpack can potentially be used to make a skilful forecast. In this example, information regarding the snow pack is leading source of predictability in seasonal forecasts of the SFV in these regions.

Line 7: Decide on stores within or in the catchment. We suggest using within. Line 11: Probably : instead of ; after 'forecasts at the seasonal scale'.

#### 14)

Yes, the former is a typo and the redundant word 'in' has been deleted. The latter suggestion of using a colon instead of a semi-colon has also been applied.

Line 15: There is no need for a comma after the closed bracket. Both times. Lines 19, 20: The second time 'force it' (end of line 19) is not necessary.

#### 15)

These changes have been applied.

Lines 31, 32: Do the references explain how and to what extent historical observations of precipitation and temperature are possible representations of future meteorological conditions in the context of the ongoing climate change? Do the historical data show any significant trend?

#### 16)

No they do not. The standard ESP approach assumes stationarity and does therefore not take into account changes in climate. Yes, there is a change signal in the historical data but making allowances for this was not within the scope of this work. However, there are future plans to investigate the added value of adjusting the historical data to mitigate this change signal before use in the modelling chain. Another approach, which we mention in the manuscript, is the post-processing of the forecasts to account for any biases related to factors such as climate change signals.

Page three:

Line 13: Maybe already mention here the number of catchments and data period. That way we already know something about how these modeling steps are applied. Other- wise the 35 in Line 35 is not so clear.

#### 17)

We feel that by adding this information in page 3, line 13 would make the sentence clumsy to read. Instead, we added information on the number of catchments to page 3, line 21; we added information regarding the data period to page 3, line 30. The affected sentences now read:

“The aim is to adapt their methodology for use in an operational environment and then evaluate the resulting prototype against the current operational system using cross-validated hindcasts for 84 gauging stations in northern Sweden (see sect. 2.6).”

And

“These outputs are pooled together rather than using an asymmetric weighting scheme due to the lack of data points, a total of 35 spring flood events (hindcast period was 1981-2015, see Sect. 2.6), from which to derive a robust weighting scheme.”

Line 14 to 15: Twice the word “brief”

**18)**

The second occurrence of brief has been removed

Line 19: first improved by Foster et al. (2010) and, later improved upon and first tested by Olsson et al. (2016).

**19)**

A comma was added.

Lines 23, 24: Here the manuscript includes already some results but is in the Materials and Methods section. Finish sentence after ‘... of these four were tested.’

**20)**

The sentence was shortened accordingly.

Line 28: Replace ‘relevant’ by ‘respective’.

**21)**

The replacement was made.

Page four:

Line 7: Is there a reference on what the seasonal forecasting practice at SMHI is? Line 9: It is not clear to us how the DBS method is different from the previous method.

**22)**

We assume you are referring to page 5, line 7. Please see our 3<sup>rd</sup> response to reviewer 2.

Line 26: We are not familiar with the teleconnection approach. A brief explanation would have been useful.

**23)**



There is a brief explanation of the revised teleconnection approach later in the next paragraph (page 4, line 31 – page 5, line 5) which gives an overview of what the approach entails. However, we have changed the word ‘the’ to ‘their’ (page 4, line 26) to clarify that we are referring to an approach proposed by Olsson et al. (2016) which we have already referred to.

Page five:

Line 2: What is the meaning of and the justification for a distance of 0.2?

24)

We are using the persistence in the teleconnection indices leading up to the forecast date to select analogue years out of the historical dataset. In order to be able to identify which of the historical years are analogues we need a selection criteria. We define an analogue to be any year whose Euclidean distance is less than 0.2 units from the Euclidean position of the ‘current’ year (see page 5, line1 – line2). The threshold is a compromise between being small enough to be sufficiently specific and being large enough to actually be able to capture some analogues from the historical data.

We appreciate that this is not entirely clear in the manuscript. We added to page 5, line 2 to clarify what the value 0.2 referred to. It now reads:

“If the values of these indices are considered to be coordinates in Euclidean space we defined analogue years to be those years whose positions are within a distance of 0.2 units in the Euclidean space from the position of the forecast year.”

Additionally, we have added a line directly after the sentence in question giving further information as discussed above. This line reads as follows:

“The threshold is a compromise between being small enough to ensure that the climate setup is indeed similar to the year in question and being large enough to actually be able to identify some analogues from the historical ensemble.”

Line 29 and following: Is there a reference (needed) for the physical support of the asymmetric weighting?

25)

The sentences in the manuscript directly following this line (page 5, line 29 – page 6, line 2) give our account for this physical support. For example, we explain that the relative importance of the snowpack earlier in the season is less than it is later in the season with respect to the coming meteorological conditions.

Page six:

Line 24: Typo: overfitted

**26)**

We have corrected the typo

Line 28: So  $n = 35$  in this case?

**27)**

Yes, we have clarified this by changing the sentence to now read:

“This process is repeated  $n$  times to give a validation dataset of length  $n$ , for this work  $n=35$ .”

Page seven:

Line 27: Why is the relative mean absolute error used (error divided by  $SFV_0^y$ )? Would the absolute error (without the division) not be a stronger focus on the flood peaks and therefore more beneficial for the assessment of the skill of forecasting the spring flood? Please explain.

**28)**

The division operation converts the error from a volume to a ratio of the observed volume. This does not alter the relative emphasis of the metric, but it does make it more intuitive.

Line 28: The superscripts suggest that it is  $SFV$  to the power of  $y$ . A different notation is clearer.

**29)**

Another notation would be clearer from a mathematical understanding, however this notation is fairly common in the hydrology literature. Additionally, by retaining the current notation we are maintaining continuity with the previous works which this work builds on.

Page ten:

Line 6: Subbasin.

**30)**

Please see our response (5<sup>th</sup>) to reviewer 1.

Line 6: There should be a reference to figure 3 included in the sentence.

**31)**

We added a cross reference to figure 3 at the end of the sentence.

Line 10: How is total runoff divided between the 3 subbasins? Would it be interesting to use the new setup also for the two other subbasins?

**32)**

The three clusters S1, S2, and S3 are made up of subbasins from seven river systems. They are not subbasins in themselves. Table 2 gives some basic statistics regarding the SFV in the subbasins of the different clusters. The prototype is aimed primarily at reservoir operators in the hydropower industry and the majority of the large operations are based in these three clusters. We agree that it would be interesting to apply this approach to the other two clusters but this will have to wait for now.

Line 17: SFV already introduced on page 3.

**33)**

Please see our response (6<sup>th</sup>) to reviewer 1.

Line 27: We don't understand why the subbasins with 61, 63, and 73 percent of missing data are also included in the 84 basins that are investigated. Has it been checked whether and how the results change when excluding those three subbasins?

**34)**

The inclusion of these basins is due to them being part of the current operational forecast system (see page 10, line 29 – line 29) and will be required going forward. We checked how their inclusion affected the results. Their inclusion typically reduced the apparent added value of the prototype over the current operational forecast system due to the need to use this data to train the statistical model. However, the reductions in the skill scores were not statistically significant.

Line 31: What is the PTHBV dataset from SMHI? is this the ptq file for HBV (but without the q)?

**35)**

Yes. PTHBV is the name of a gridded product for Sweden of P and T observations which is used to populate the ptqw file in HBV. The Q and W values are populated using station data.

Page eleven:

Line 4: Do you refer to the performance measures for the HBV rainfall-runoff model of the historical data?

**36)**

Yes, these are validation scores for HBV using perfect hindcasts i.e. forced using observed P and T.

Line 7: The 'than' near the end of the line is missing one or two adjectives describing latitude and elevation. Decide on either and or or.

**37)**

We have reworded this line to now read:

"Subbasins in cluster S1 are typically at a latitude or elevation lower than those in clusters S2 and S3, similarly the subbasins in S2 with respect to those in S3."

Line 22-24: We don't really understand where the 15 and 51 come from. We probably missed that somewhere, or is it not explained anywhere?

**38)**

These are the number of ensemble members that are available in the seasonal forecasts/hindcasts from the ECMWF. We have reworded page 11, line 23 to make this clearer in the context of the surrounding paragraph. It now reads:

"This is because the number of ensemble members available in the ECMWF seasonal forecast is limited to 15 for the hindcast period while the operational seasonal forecast ensemble has 51 members."

Page thirteen:

Line 21: Are these 5% of the catchments located in a certain area or do they have similar characteristics? Large/small, steep/flat, northern/southern?

**39)**

As we are more interested in the overall performance we did not put an emphasis on decomposing the possible reasons behind why the results for specific stations may have performed the way they did. Your questions are valid and should be investigated going forward, but in the context of this work it is less important. However, results from both this work and previous work by Olsson et al. (2016) suggest that the subbasins where the prototype does not perform as well tend to be located in, but not isolated to, the middle and lower reaches of the rivers. Also, please see our earlier response (no. 7).

Page fourteen:

Line 29: Why was exactly this site choose for the analysis of the forecast ensemble sharpness? Just one sentence, why exactly this basin is relevant out of the whole set of the 84 sites.

#### 40)

The following sentence was included after page 14, line 29. It reads:

“This basin was chosen as an example of a where the prototype showed typical performance results i.e. neither the best nor the worst.”

Page sixteen:

Line 5-18: This is more discussion than real conclusion. Move?

#### 41)

We moved the parts that were more discussion in nature to the results and discussion section. This section now reads:

“In this paper we present the development and evaluation of a hydrological seasonal forecast system prototype for predicting the SFV in Swedish rivers. Initially, two versions of the prototype, MEads and MEhds, were evaluated together with the HE using climatology as a reference to both help select which version of the prototype to proceed with and to get a general impression of their skill to forecast the SFV. Thereafter the chosen prototype was evaluated using HE as a reference and finally the sharpness of the hindcast ensembles were analysed.

The main findings are summarized below:

- The prototype is able to outperform the HE approach 57% of the time on average. It is at worst comparable to the HE in forecast skill and at best clearly more skilful.
- The prototype is able to reduce the forecast error by 6% on average. This translates to an average volume of  $9.5 \times 10^6$  m<sup>3</sup>.
- The prototype is generally more sensitive to uncertainty, that is to say that the ensemble spread tends to be more correlated with the forecast error. This is potentially useful to users as the ensemble spread could be used as a measure of the forecast quality.
- The prototype is able to improve the prediction of above and below normal events early in the season.”

Figures:

Figure 2: In the figure description it is mentioned that the spring flood is in the period between the onset and the last day of July. On the x-axis the days since the 1st January are written. We think that for the reader it would be easier if on the x-axis the first of the months were labelled and the date of the 80 days threshold was indicated (20th or 21st of March).

42)

We disagree with the need to change the x-axes labels to dates. We feel that by doing so would complicate the figure more than it simplifies it. Figure 2 is meant as a generalised schematic showing the concept of how we define the spring flood period and not meant to give specific dates to the readers which are not mentioned elsewhere in the manuscript. The only deviation from what is mentioned in the body of the manuscript is that the 31<sup>st</sup> July is not explicitly.

As a compromise we have added the day numbers for the 31<sup>st</sup> July in parentheses the date is mentioned in the figure description. It now reads:

“The spring flood is the period between the onset and the last day of July (day 211/212 since the 1st January).”
